# Supplementary material for: Serum IgA/C3 ratio and glomerular C3 staining predict progression of IgA nephropathy in children
Source: PubMed Central journal article supplement — Transl Pediatr. 2021 Mar;10(3):666–72. doi: 10.21037/tp-21-90 (PMC8041611; doi:10.21037/tp-21-90), 2021-03
Supplement: tp-10-03-666-dss.pdf [file tp-10-03-666-dss.pdf]

## Data Sharing Statement

|                     |                                                                                                                                                     |                                                                                                                                                               |
|---------------------|-----------------------------------------------------------------------------------------------------------------------------------------------------|---------------------------------------------------------------------------------------------------------------------------------------------------------------|
| <b>Article Info</b> | <a href="http://dx.doi.org/10.21037/tp-21-90">http://dx.doi.org/10.21037/tp-21-90</a>                                                               |                                                                                                                                                               |
| <b>Item</b>         | <b>Question</b>                                                                                                                                     | <b>Authors' Response<br/>(place “-” if not applicable)</b>                                                                                                    |
| 1                   | Would you like to share data collected for your study to others?                                                                                    | Yes.                                                                                                                                                          |
| 2                   | If not, would you like to share the reason for your decision?                                                                                       | -                                                                                                                                                             |
| 3                   | What data in particular will be shared?                                                                                                             | The data evaluated the relationship between biomarkers (serum IgA/C3 ratio and glomerular C3 staining) and risk factors (proteinuria and GRF) will be shared. |
| 4                   | Any other documents will be shared? Such as study protocol, statistical analysis plan, informed consent form, clinical study report, analytic code. | Statistical analysis plan, informed consent form will also be shared if requested.                                                                            |
| 5                   | When will data availability begin?                                                                                                                  | From the publication date.                                                                                                                                    |
| 6                   | When will data availability end?                                                                                                                    | Two years within the publication date, since the technique may be updated over time.                                                                          |
| 7                   | To whom will you share the data?                                                                                                                    | Doctors who are interested in studies of IgAN.                                                                                                                |
| 8                   | For what type of analysis or purpose?                                                                                                               | For evaluated serum IgA/C3 ratio and glomerular C3 staining as biomarkers in IgAN.                                                                            |
| 9                   | How or where can the data/documents be obtained?                                                                                                    | Emails could be sent to the address below to obtain the shared data:<br>langyycly@163.com                                                                     |
| 10                  | Any other restrictions?                                                                                                                             | We may balance the potential benefits and risks for each request and then provide the data that could be shared.                                              |
